# Supplementary material
Source: Copernicus journal article supplement (doi:10.5194/egusphere-2026-3213)
Supplement: Supplementary file 1 [file egusphere-2026-3213-supplement.pdf]

**[Effects of freeze–thaw processes on the sources and pathways of shallow groundwater recharge in the Qinghai Lake Basin]**

[Wenhao Zhang <sup>a,b</sup>, Xiaoyan Li <sup>a,b,\*</sup>, Yuanhong Deng <sup>a,b</sup>, Guangrong Hu <sup>a,b</sup>, Fangzhong Shi <sup>a,b</sup>]

<sup>a</sup> State Key Laboratory of Earth Surface Processes and Hazards Risk Governance, Faculty of Geographical Science, Beijing Normal University, Beijing 100875, China

<sup>b</sup> School of Natural Resources, Faculty of Geographical Science, Beijing Normal University, Beijing 100875, China

**Contents of this file**

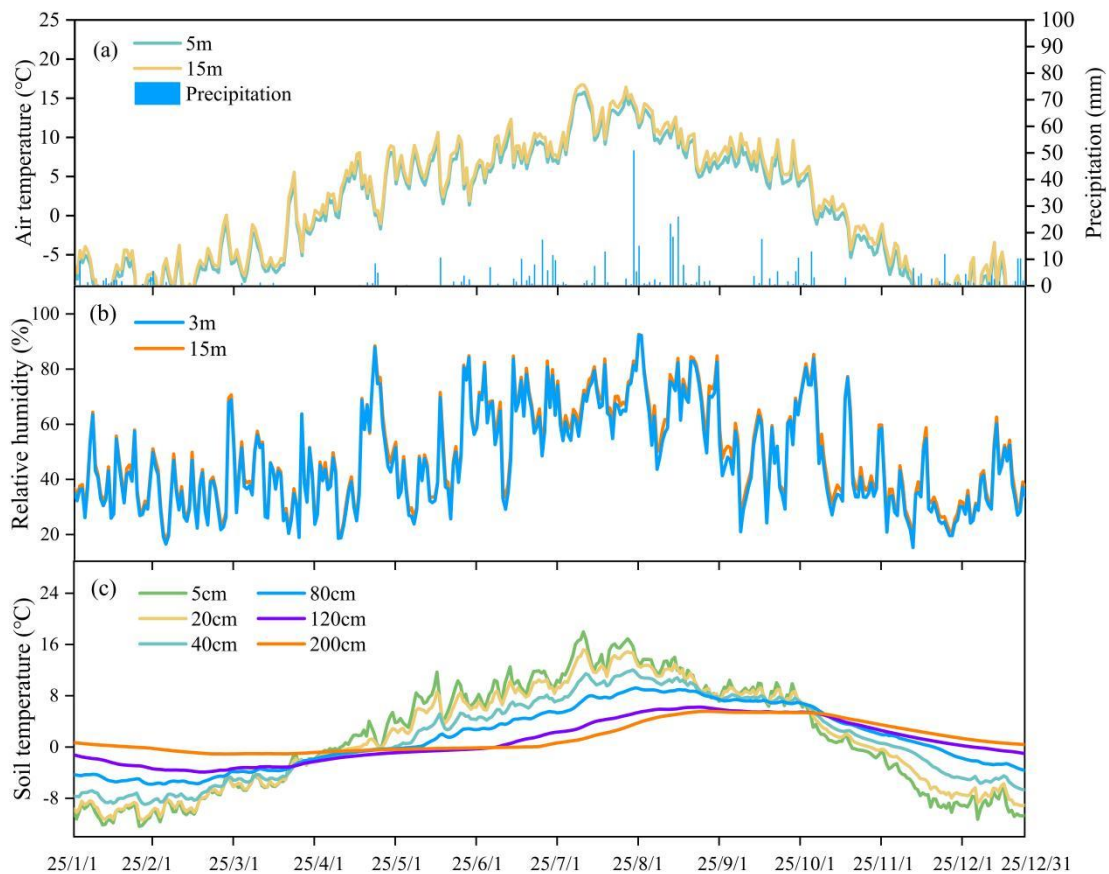

**Fig. S1.** Variations in air temperature and soil temperature in the QLB.
